# Supplementary material for: Ancient origin of fucosylated xyloglucan in charophycean green algae
Source: PubMed Central journal article supplement (PMC8211770; doi:10.1038/s42003-021-02277-w), 2021-06-17
Supplement: 42003_2021_2277_MOESM3_ESM.pdf [file 42003_2021_2277_MOESM3_ESM.pdf]

## **Description of Additional Supplementary Files**

**File name:** Supplementary Data 1

**Description:** Key to phylogenetic trees and raw data underlying CoMPP analyses.
